# Supplementary material
Source: Research Square preprint supplement (doi:10.21203/rs.3.rs-9315837/v1)
Supplement: Supplementary file 1 [file e5552aaec55c30c6952d9d8e.pdf]

# **Ice Giants Revisited: Uranus and Neptune as Magma Ocean Worlds**

Supplemental Information

April 3, 2026

# Neptune Summary

Table 1: Neptune interior model summary. The model has two fixed inputs (Section 1) and two free parameters optimized by MCMC (Section 2). Section 3 compares model predictions to observations.

| <b>Fixed Inputs (set by Neptune)</b>               |                           |                                          |
|----------------------------------------------------|---------------------------|------------------------------------------|
| Parameter                                          | Value                     | Source                                   |
| Total mass $M$                                     | $1.024 \times 10^{26}$ kg | Jacobson (2009) <sup>a</sup>             |
| Equilibrium temperature $T_{\text{eq}}$            | 47 K                      | Voyager 2 <sup>b</sup>                   |
| <b>Free Parameters (MCMC best fit)</b>             |                           |                                          |
| Parameter                                          | Best-fit value            | 68% interval                             |
| Binodal surface pressure $P_{\text{binodal}}$      | 10.12 GPa                 | $9.20^{+0.67}_{-1.27}$ GPa               |
| Bulk H <sub>2</sub> mass fraction $f_{\text{H}_2}$ | 10.07 wt%                 | $9.73^{+0.25}_{-0.37}$ wt%               |
| <b>Model Predictions vs. Neptune Observations</b>  |                           |                                          |
| Observable                                         | Model                     | Neptune observed                         |
| 1-bar radius $R_{1\text{bar}}$                     | 24,759 km                 | 24,764 km <sup>c</sup>                   |
| Bulk density $\rho$                                | 1610 kg m <sup>-3</sup>   | 1638 kg m <sup>-3c</sup>                 |
| $J_2 \times 10^6$                                  | 3535.5                    | $3528.9 \pm 48.9^{\dagger,d}$            |
| $J_4 \times 10^6$                                  | -35.84                    | $-35.83 \pm 10.76^{\dagger,d}$           |
| Norm. moment of inertia $C/MR^2$                   | 0.2313                    | $0.2315 \pm 0.0046^e$                    |
| Internal luminosity $L_{\text{int}}$               | $1.58 \times 10^{15}$ W   | $\sim 2-3 \times 10^{15}$ W <sup>f</sup> |

<sup>†</sup>  $1\sigma$  uncertainty used in the MCMC cost function (cal sigma mode): LOO-weighted in-sample calibration residual for  $J_2$  ( $48.9 \times 10^{-6}$ , 1.4%), floored at the observational sigma for  $J_4$  ( $10.76 \times 10^{-6}$ , 30%).  $J_2$  and  $J_4$  are consistency checks; all four observables are within  $0.13\sigma$  at the maximum-likelihood point.

<sup>a</sup> (Jacobson, 2009).

<sup>b</sup> (Conrath et al., 1989) (Voyager 2 IRIS; equilibrium temperature derived from infrared measurements).

<sup>c</sup> (Lindal, 1992) (Voyager 2 radio occultation; 1-bar equatorial radius 24 766 km adopted; bulk density computed from mass and volumetric mean radius).

<sup>d</sup>  $J_2$  and  $J_4$  from (Wang et al., 2023), originally at  $R_{\text{ref}} = 25,225$  km, renormalized to  $R_{\text{eq}} = 24,766$  km following (Morf and Helled, 2025).

<sup>e</sup> (Nettelmann et al., 2013); 2% uncertainty assumed.

<sup>f</sup> (Pearl and Conrath, 1991).

## MCMC Estimation for Two Free Parameters

Table 2: Posterior parameter estimates and maximum-likelihood solution.

| Parameter                                           | Posterior Median | 68% Interval     |
|-----------------------------------------------------|------------------|------------------|
| Surface pressure $P_{\text{binodal}}$ (GPa)         | 9.197            | +0.666 / - 1.266 |
| Bulk H <sub>2</sub> fraction $f_{\text{H}_2}$ (wt%) | 9.726            | +0.252 / - 0.373 |
| <i>Maximum likelihood solution</i>                  |                  |                  |
| $P_{\text{binodal}}$ (GPa)                          |                  | 10.1240          |
| $f_{\text{H}_2}$ (wt%)                              |                  | 10.0659          |
| $\ln p$                                             |                  | -0.0104          |
| $\chi_{\text{total}}^2$                             |                  | 0.0207           |
| $\chi_{\text{reduced}}^2$                           | 0.0104           | (d.o.f. = 2)     |

## Predicted Observables vs. Neptune (Cost Function)

Table 3: Best-fit predicted observables compared to Neptune observations. All residuals are in units of the total  $1\sigma$  uncertainty used in the cost function.

| Observable             | Predicted | Observed | Residual | $\Delta/\sigma$ |
|------------------------|-----------|----------|----------|-----------------|
| $J_2 \times 10^6$      | 3535.51   | 3528.91  | +6.60    | +0.13 $\sigma$  |
| $J_4 \times 10^6$      | -35.84    | -35.83   | -0.01    | -0.00 $\sigma$  |
| $C/MR^2$               | 0.2313    | 0.2315   | -0.0002  | -0.05 $\sigma$  |
| $R_{1\text{bar}}$ (km) | 24759.1   | 24764.0  | -4.9     | -0.02 $\sigma$  |

Table 4: Observational uncertainties used in the MCMC cost function (cal sigma mode).  $\sigma_{\text{cal}}$  for  $J_2$  is the LOO-weighted in-sample residual (1.4%).  $\sigma_{\text{cal}}$  for  $J_4$  equals the observational sigma (obs floor applied).  $\sigma_{\text{total}}$  is the value actually used in the cost function.

| Quantity               | $\sigma_{\text{obs}}$ | $\sigma_{\text{cal}}$     | $\sigma_{\text{total}}$ | Basis     |
|------------------------|-----------------------|---------------------------|-------------------------|-----------|
| $J_2 \times 10^6$      | 4.14                  | 48.94 (1.4%)              | 48.94                   | LOO-wt    |
| $J_4 \times 10^6$      | 10.76                 | 10.76 (30.0%)             | 10.76                   | obs floor |
| $C/MR^2$               |                       | $\pm 0.0046$ (assumed 2%) |                         | —         |
| $R_{1\text{bar}}$ (km) |                       | $\pm 247.6$ (assumed 1%)  |                         | —         |

## Predicted Bulk Planet Properties

Table 5: Bulk planet properties at the best-fit parameters.

| Property                                         | Value                                            |
|--------------------------------------------------|--------------------------------------------------|
| Total mass, input Neptune value                  | $1.024 \times 10^{26}$ kg ( $17.15 M_{\oplus}$ ) |
| Radius at 1-bar level ( $R_{\oplus}$ )           | 3.886                                            |
| Radius at 1-bar level (km)                       | 24,759.2                                         |
| Neptune observed bulk density                    | $\approx 1638$ kg m <sup>-3</sup>                |
| Normalized moment of inertia $C/MR^2$<br>(1-bar) | 0.231                                            |

## Predicted Thermal Properties

Table 6: Thermal properties of the best-fit model.

| Property                                                      | Value                                            |
|---------------------------------------------------------------|--------------------------------------------------|
| Equilibrium temperature $T_{\text{eq}}$ , input Neptune value | 47.0 K <sup>b</sup>                              |
| Radiation temperature $T_{\text{rad}}$                        | 43.74 K                                          |
| Internal luminosity $L_{\text{int}}$                          | $1.580 \times 10^{15}$ W                         |
| Neptune observed $L_{\text{int}}$                             | $\sim 2\text{--}3 \times 10^{15}$ W <sup>f</sup> |
| Central temperature                                           | 7271 K                                           |
| Surface temperature (base of atmosphere)                      | 2750 K                                           |
| Mass-weighted temperature                                     | 1704 K                                           |
| Temperature at radiative–convective boundary $T_{\text{rcb}}$ | 650 K                                            |

## Predicted Core Structure

Table 7: Core (silicate + H<sub>2</sub>–silicate mixture) properties.

| Property                                 | Value                   |
|------------------------------------------|-------------------------|
| Core mass ( $M_{\oplus}$ )               | 16.196                  |
| Core radius ( $R_{\oplus}$ )             | 3.042                   |
| Metal core radius ( $R_{\oplus}$ )       | 0.000                   |
| Core volume (m <sup>3</sup> )            | $3.049 \times 10^{22}$  |
| Bulk core density (kg m <sup>-3</sup> )  | 3172.3                  |
| H <sub>2</sub> mass fraction in core     | 0.048                   |
| Thermal energy, core (J)                 | $8.741 \times 10^{32}$  |
| Gravitational potential energy, core (J) | $-2.034 \times 10^{34}$ |

## Predicted Atmosphere Structure

Table 8: Atmospheric envelope properties.

| Property                                          | Value                                 |
|---------------------------------------------------|---------------------------------------|
| Atmosphere mass (kg)                              | $5.700 \times 10^{24}$                |
| Atmosphere mass fraction ( $M_{\text{atm}}/M_p$ ) | $5.565 \times 10^{-2}$                |
| H <sub>2</sub> gas mass fraction of planet        | 5.272%                                |
| H <sub>2</sub> condensate mass fraction of planet | $2.342 \times 10^{-3}\%$              |
| H <sub>2</sub> mass fraction in atmosphere (gas)  | 0.9995                                |
| H <sub>2</sub> mass fraction whole planet         | 0.1007                                |
| Surface pressure at base of atmosphere            | $1.012 \times 10^5$ bar (= 10.12 GPa) |
| Pressure at base of atmosphere (weight)           | $5.175 \times 10^5$ bar               |
| Radiative-convective boundary height              | 4805 km                               |
| $R_{\text{rcb}}/R_c$                              | 1.248                                 |
| Pressure at rcb                                   | 201.4 bar                             |
| Optical depth at rcb                              | $9.52 \times 10^4$                    |
| $\lambda_{\text{rcb}}$                            | 120.12                                |
| Convection inhibited layer thickness              | $1.02 \times 10^5$ m                  |
| Boundary layer thickness, envelope                | 70.4 m                                |
| $R(1 \text{ bar})/R_c$                            | 1.278                                 |
| Atmosphere volume (1-bar, m <sup>3</sup> )        | $3.309 \times 10^{22}$                |
| Mean atm. density (1-bar, kg m <sup>-3</sup> )    | 172.2                                 |
| Planet volume fraction: core                      | 0.474                                 |
| Planet volume fraction: atmosphere                | 0.526                                 |

## Predicted Total Energy Budget

Table 9: Integrated energy budget for the full planet.

| Quantity                               | Value (J)               |
|----------------------------------------|-------------------------|
| Thermal energy, core                   | $+8.741 \times 10^{32}$ |
| Thermal energy, planet                 | $+9.249 \times 10^{32}$ |
| Gravitational potential energy, core   | $-2.034 \times 10^{34}$ |
| Gravitational potential energy, planet | $-2.151 \times 10^{34}$ |
| Total energy (planet)                  | $-2.058 \times 10^{34}$ |

# Uranus Summary

Table 10: Uranus interior model summary. The model has two fixed inputs (Section 1) and two free parameters optimized by MCMC (Section 2). Section 3 compares model predictions to observations.

| <b>Fixed Inputs (set by Uranus)</b>                |                           |                                          |
|----------------------------------------------------|---------------------------|------------------------------------------|
| Parameter                                          | Value                     | Source                                   |
| Total mass $M$                                     | $8.681 \times 10^{25}$ kg | Jacobson & Park (2025) <sup>A</sup>      |
| Equilibrium temperature $T_{\text{eq}}$            | 58 K                      | Pearl & Conrath (1990) <sup>B</sup>      |
| <b>Free Parameters (MCMC best fit)</b>             |                           |                                          |
| Parameter                                          | Best-fit value            | 68% interval                             |
| Binodal surface pressure $P_{\text{binodal}}$      | 9.84 GPa                  | $9.23^{+0.61}_{-1.13}$ GPa               |
| Bulk H <sub>2</sub> mass fraction $f_{\text{H}_2}$ | 10.90 wt%                 | $10.47^{+0.35}_{-0.68}$ wt%              |
| <b>Model Predictions vs. Uranus Observations</b>   |                           |                                          |
| Observable                                         | Model                     | Uranus observed                          |
| 1-bar radius $R_{1\text{bar}}$                     | 25,432 km                 | 25,559 km <sup>C</sup>                   |
| $J_2 \times 10^6$                                  | 3507.30                   | $3509.29 \pm 58.9^{\dagger,D}$           |
| $J_4 \times 10^6$                                  | -35.56                    | $-35.52 \pm 0.466^{\dagger,D}$           |
| Norm. moment of inertia $C/MR^2$                   | 0.2217                    | $0.2250 \pm 0.0045^E$                    |
| Bulk density $\rho^{\ddagger}$                     | 1260 kg m <sup>-3</sup>   | $\approx 1270$ kg m <sup>-3</sup>        |
| Internal luminosity $L_{\text{int}}^{\S}$          | $5.29 \times 10^{14}$ W   | $\sim 6.4 \times 10^{14}$ W <sup>B</sup> |

<sup>†</sup> Uncertainties used in the MCMC cost function (cal sigma mode).  $J_2$  sigma ( $58.871 \times 10^{-6}$ , 1.68%) is the LOO-weighted in-sample calibration residual.  $J_4$  sigma ( $0.466 \times 10^{-6}$ , 1.31%) equals the observational sigma (obs floor applied). For Uranus,  $R_{\text{ref}} = R_{\text{eq}} = 25,559$  km (French et al. 2024 = Lindal et al. 1987), so published gravity values are already normalized to the 1-bar equatorial radius; no renormalization was applied.

<sup>‡</sup> Uranus observed bulk density  $\approx 1270$  kg m<sup>-3</sup> uses the IAU volumetric mean radius.

<sup>§</sup> Internal luminosity based on  $R_a/R_{a_c} = 10^{10}$ .

<sup>A</sup> (Jacobson and Park, 2025).

<sup>B</sup> (Pearl and Conrath, 1990) (Voyager 2 IRIS; equilibrium temperature and internal luminosity for Uranus).

<sup>C</sup> (Lindal et al., 1987) (Voyager 2 radio occultation; 1-bar equatorial radius 25 559 km).

<sup>D</sup> (French et al., 2024); reported at  $R_{\text{ref}} = R_{\text{eq}} = 25,559$  km — no renormalization required. Rotation period from (Desch et al., 1986).

<sup>E</sup> (Nettelmann et al., 2013); see also (Podolak and Helled, 2012). 2% uncertainty assumed.

## MCMC Estimation for Two Free Parameters

Table 11: Posterior parameter estimates and maximum-likelihood solution.

| Parameter                                           | Posterior Median | 68% Interval     |
|-----------------------------------------------------|------------------|------------------|
| Surface pressure $P_{\text{binodal}}$ (GPa)         | 9.228            | +0.606 / - 1.125 |
| Bulk H <sub>2</sub> fraction $f_{\text{H}_2}$ (wt%) | 10.465           | +0.346 / - 0.684 |
| <i>Maximum likelihood solution</i>                  |                  |                  |
| $P_{\text{binodal}}$ (GPa)                          |                  | 9.8392           |
| $f_{\text{H}_2}$ (wt%)                              |                  | 10.8979          |
| $\ln p$                                             |                  | -0.3948          |
| $\chi_{\text{total}}^2$                             |                  | 0.7897           |
| $\chi_{\text{reduced}}^2$                           | 0.3948           | (d.o.f. = 2)     |

## Predicted Observables vs. Uranus (Cost Function)

Table 12: Best-fit predicted observables compared to Uranus observations. All residuals are in units of the total  $1\sigma$  uncertainty used in the cost function.

| Observable             | Predicted | Observed | Residual | $\Delta/\sigma$ |
|------------------------|-----------|----------|----------|-----------------|
| $J_2 \times 10^6$      | 3507.29   | 3509.29  | -2.00    | -0.03 $\sigma$  |
| $J_4 \times 10^6$      | -35.56    | -35.52   | -0.03    | -0.07 $\sigma$  |
| $C/MR^2$               | 0.2217    | 0.2250   | -0.0033  | -0.73 $\sigma$  |
| $R_{1\text{bar}}$ (km) | 25431.4   | 25559.0  | -127.6   | -0.50 $\sigma$  |

Table 13: Observational uncertainties used in the MCMC cost function (cal sigma mode).  $\sigma_{\text{cal}}$  for  $J_2$  is the LOO-weighted in-sample residual from the all-4-planet fit (Jupiter, Saturn, Uranus, Neptune), with ice giants carrying  $\sim 99.8\%$  of the total weight.  $\sigma_{\text{cal}}$  for  $J_4$  equals the observational sigma (obs floor applied).  $\sigma_{\text{total}}$  is the value used in the cost function.

| Quantity               | $\sigma_{\text{obs}}$ | $\sigma_{\text{cal}}$     | $\sigma_{\text{total}}$ | Basis     |
|------------------------|-----------------------|---------------------------|-------------------------|-----------|
| $J_2 \times 10^6$      | 0.412                 | 58.871 (1.68%)            | 58.871                  | LOO-wt    |
| $J_4 \times 10^6$      | 0.466                 | 0.466 (1.31%)             | 0.466                   | obs floor |
| $C/MR^2$               |                       | $\pm 0.0045$ (assumed 2%) |                         | —         |
| $R_{1\text{bar}}$ (km) |                       | $\pm 255.6$ (assumed 1%)  |                         | —         |

*Note:* No  $J_2/J_4$  renormalization was applied. For Uranus,  $R_{\text{ref}} = R_{\text{eq}} = 25,559$  km (French et al. 2024 = Lindal et al. 1987), so the published values are already at the 1-bar equatorial radius. Contrast with Neptune, where  $R_{\text{ref}} \neq R_{\text{eq}}$ .  $J_2/J_4$  forward model uses an empirical calibration with an all-4-planet fit:  $J_2 = a q + b q C + c q^2$  (in-sample residuals  $< 0.13\%$ );  $J_4 = \text{slope}_{\text{ice}} \times J_2$  (mean  $J_4/J_2$  for Uranus + Neptune; residuals  $< 1.4\%$ ).

## Predicted Bulk Planet Properties

Table 14: Bulk planet properties at the best-fit parameters.

| Property                                         | Value                                             |
|--------------------------------------------------|---------------------------------------------------|
| Total mass, input Uranus value                   | $8.681 \times 10^{25}$ kg ( $14.536 M_{\oplus}$ ) |
| Radius at 1-bar level ( $R_{\oplus}$ )           | 3.995                                             |
| Radius at 1-bar level (km)                       | 25,451.2                                          |
| Uranus observed bulk density                     | $\approx 1270$ kg m <sup>-3</sup>                 |
| Normalized moment of inertia $C/MR^2$<br>(1-bar) | 0.223                                             |

## Predicted Thermal Properties

Table 15: Thermal properties of the best-fit model.

| Property                                                      | Value                                    |
|---------------------------------------------------------------|------------------------------------------|
| Equilibrium temperature $T_{\text{eq}}$ , input Uranus value  | 58.1 K <sup>B</sup>                      |
| Radiation temperature $T_{\text{rad}}$                        | 54.07 K                                  |
| Internal luminosity $L_{\text{int}}$                          | $4.628 \times 10^{14}$ W                 |
| Uranus observed $L_{\text{int}}$                              | $\sim 6.4 \times 10^{14}$ W <sup>B</sup> |
| Central temperature                                           | 7041.2 K                                 |
| Surface temperature (base of atmosphere)                      | 2826.7 K                                 |
| Mass-weighted temperature                                     | 1829.1 K                                 |
| Temperature at radiative–convective boundary $T_{\text{rcb}}$ | 710.6 K                                  |

## Predicted Core Structure

Table 16: Core (silicate + H<sub>2</sub>–silicate mixture) properties.

| Property                                 | Value                   |
|------------------------------------------|-------------------------|
| Core mass ( $M_{\oplus}$ )               | 13.740                  |
| Core radius ( $R_{\oplus}$ )             | 3.036                   |
| Metal core radius ( $R_{\oplus}$ )       | 0.000                   |
| Core volume (m <sup>3</sup> )            | $3.033 \times 10^{22}$  |
| Bulk core density (kg m <sup>-3</sup> )  | 2705.7                  |
| H <sub>2</sub> mass fraction in core     | 0.057                   |
| Thermal energy, core (J)                 | $+7.277 \times 10^{32}$ |
| Gravitational potential energy, core (J) | $-1.461 \times 10^{34}$ |

## Predicted Atmosphere Structure

Table 17: Atmospheric envelope properties.

| Property                                          | Value                                 |
|---------------------------------------------------|---------------------------------------|
| Atmosphere mass (kg)                              | $4.758 \times 10^{24}$                |
| Atmosphere mass fraction ( $M_{\text{atm}}/M_p$ ) | $5.481 \times 10^{-2}$                |
| H <sub>2</sub> gas mass fraction of planet        | 5.196%                                |
| H <sub>2</sub> condensate mass fraction of planet | $1.152 \times 10^{-3}\%$              |
| H <sub>2</sub> mass fraction in atmosphere (gas)  | 0.9983                                |
| H <sub>2</sub> mass fraction whole planet         | 0.1087                                |
| Surface pressure at base of atmosphere            | $9.434 \times 10^4$ bar (= 9.434 GPa) |
| Pressure at base of atmosphere (weight)           | $4.010 \times 10^5$ bar               |
| Radiative–convective boundary height              | 5164 km                               |
| $R_{\text{rcb}}/R_c$                              | 1.267                                 |
| Pressure at rcb                                   | 655.8 bar                             |
| Optical depth at rcb                              | $7.92 \times 10^5$                    |
| $\lambda_{\text{rcb}}$                            | 91.97                                 |
| Convection inhibited layer thickness              | $1.45 \times 10^5$ m                  |
| Boundary layer thickness, envelope                | 393.7 m                               |
| $R(1 \text{ bar})/R_c$                            | 1.316                                 |
| Atmosphere volume (1-bar, m <sup>3</sup> )        | $3.873 \times 10^{22}$                |
| Mean atm. density (1-bar, kg m <sup>-3</sup> )    | 122.8                                 |
| Planet volume fraction: core                      | 0.434                                 |

## Predicted Total Energy Budget

Table 18: Integrated energy budget for the full planet.

| Quantity                               | Value (J)               |
|----------------------------------------|-------------------------|
| Thermal energy, core                   | $+7.145 \times 10^{32}$ |
| Thermal energy, planet                 | $+7.745 \times 10^{32}$ |
| Gravitational potential energy, core   | $-1.465 \times 10^{34}$ |
| Gravitational potential energy, planet | $-1.580 \times 10^{34}$ |
| Total energy (planet)                  | $-1.502 \times 10^{34}$ |

## References

- B. J. Conrath, F. M. Flasar, R. Hanel, V. Kunde, W. Maguire, J. Pearl, J. Pirraglia, R. Samuelson, P. Gierasch, and A. Weir. Infrared observations of the Neptunian system. *Science*, 246:1454–1459, 1989. doi:[10.1126/science.246.4936.1454](https://doi.org/10.1126/science.246.4936.1454). URL <https://doi.org/10.1126/science.246.4936.1454>.

- M. D. Desch, J. E. P. Connerney, and M. L. Kaiser. The rotation period of Uranus. *Nature*, 322: 42–43, 1986. doi:[10.1038/322042a0](https://doi.org/10.1038/322042a0). URL <https://doi.org/10.1038/322042a0>.
- R. G. French, M. M. Hedman, P. D. Nicholson, P.-Y. Longaretti, and C. A. McGhee-French. The Uranus system from occultation observations (1977–2006): Rings, pole direction, gravity field, and masses of Cressida, Cordelia, and Ophelia. *Icarus*, 411:115957, 2024. doi:[10.1016/j.icarus.2024.115957](https://doi.org/10.1016/j.icarus.2024.115957). URL <https://doi.org/10.1016/j.icarus.2024.115957>.
- R. A. Jacobson. The orbits of the Neptune trojans and the mass of Neptune. *The Astronomical Journal*, 137:4322–4329, 2009. doi:[10.1088/0004-6256/137/5/4322](https://doi.org/10.1088/0004-6256/137/5/4322). URL <https://doi.org/10.1088/0004-6256/137/5/4322>.
- R. A. Jacobson and R. S. Park. The masses of Uranus and its major satellites from spacecraft and earth-based observations. *The Astronomical Journal*, 169:65, 2025. doi:[10.3847/1538-3881/ad9b4d](https://doi.org/10.3847/1538-3881/ad9b4d). URL <https://doi.org/10.3847/1538-3881/ad9b4d>.
- G. F. Lindal. The atmosphere of Neptune: an analysis of radio occultation data acquired with Voyager 2. *The Astronomical Journal*, 103:967–982, 1992. doi:[10.1086/116119](https://doi.org/10.1086/116119). URL <https://doi.org/10.1086/116119>.
- G. F. Lindal, J. R. Lyons, D. N. Sweetnam, V. R. Eshleman, D. P. Hinson, and G. L. Tyler. The atmosphere of Uranus: Results of radio occultation measurements with Voyager 2. *Journal of Geophysical Research*, 92:14987–15001, 1987. doi:[10.1029/JA092iA13p14987](https://doi.org/10.1029/JA092iA13p14987). URL <https://doi.org/10.1029/JA092iA13p14987>.
- L. Morf and R. Helled. Icy or rocky? Convective or stable? New interior models of Uranus and Neptune. *Astronomy & Astrophysics*, 704:A183, 2025. doi:[10.1051/0004-6361/202556911](https://doi.org/10.1051/0004-6361/202556911). URL <https://doi.org/10.1051/0004-6361/202556911>.
- N. Nettelmann, J. J. Fortney, K. Moore, and C. Mankovich. An assessment of giant planet interior models with an application to Saturn’s interior. *Planetary and Space Science*, 77:143–151, 2013. doi:[10.1016/j.pss.2012.06.019](https://doi.org/10.1016/j.pss.2012.06.019). URL <https://doi.org/10.1016/j.pss.2012.06.019>.
- J. C. Pearl and B. J. Conrath. The albedo, effective temperature, and energy balance of Uranus, as determined from Voyager IRIS data. *Journal of Geophysical Research*, 95:18921–18930, 1990. doi:[10.1029/JA095iA12p18921](https://doi.org/10.1029/JA095iA12p18921). URL <https://doi.org/10.1029/JA095iA12p18921>.
- J. C. Pearl and B. J. Conrath. The albedo, effective temperature, and energy balance of Neptune, as determined from Voyager IRIS data. *Journal of Geophysical Research*, 96:18921–18930, 1991. doi:[10.1029/91JA01087](https://doi.org/10.1029/91JA01087). URL <https://doi.org/10.1029/91JA01087>.
- M. Podolak and R. Helled. What do we really know about Uranus and Neptune? *The Astrophysical Journal Letters*, 759:L32, 2012. doi:[10.1088/2041-8205/759/2/L32](https://doi.org/10.1088/2041-8205/759/2/L32). URL <https://doi.org/10.1088/2041-8205/759/2/L32>.
- B. Wang, J. Yan, W. Gao, Y. Yuan, S. Sun, M. Ye, and J.-P. Barriot. The Neptunian gravity estimated from the motion of Triton based on astrometric observations. *Astronomy & Astrophysics*, 671:A70, 2023. doi:[10.1051/0004-6361/202244537](https://doi.org/10.1051/0004-6361/202244537). URL <https://doi.org/10.1051/0004-6361/202244537>.
